# Supplementary material for: PRDM4 inhibits cell proliferation and tumorigenesis by inactivating the PI3K/AKT signaling pathway through targeting of PTEN in cervical carcinoma
Source: PubMed Central journal article supplement (PMC8102194; doi:10.1038/s41388-021-01765-x), 2021-04-12
Supplement: 41388_2021_1765_MOESM1_ESM.pdf [file 41388_2021_1765_MOESM1_ESM.pdf]

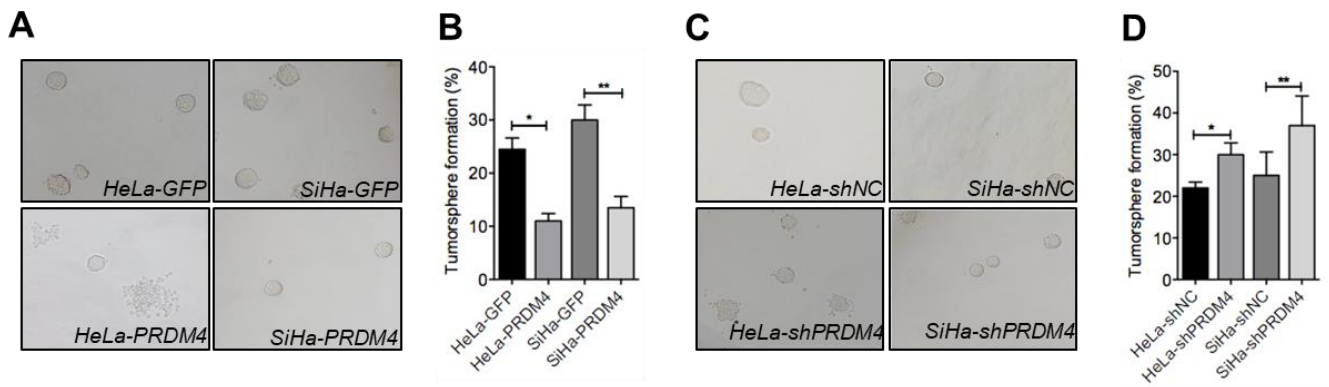

**Supplementary Figure 1. PRDM4 inhibited the tumorsphere formation *in vitro***

(A and B) Representative photos of the tumorspheres and the percentage of tumorsphere formation are shown in the PRDM4-overexpressing HeLa and SiHa cells and the control cells. (C and D) Representative photos of the tumorspheres and the percentage of tumorsphere formation are shown in the PRDM4-silenced HeLa and SiHa cells and the control cells. Scale bar, 100  $\mu$ m. Number of migratory or invasion cells was shown as mean  $\pm$  SD from three independent experiments using triplicate measurements and statistically analyzed with Student's *t*-test in each experiment. \* $p < 0.05$ , \*\* $p < 0.01$ .

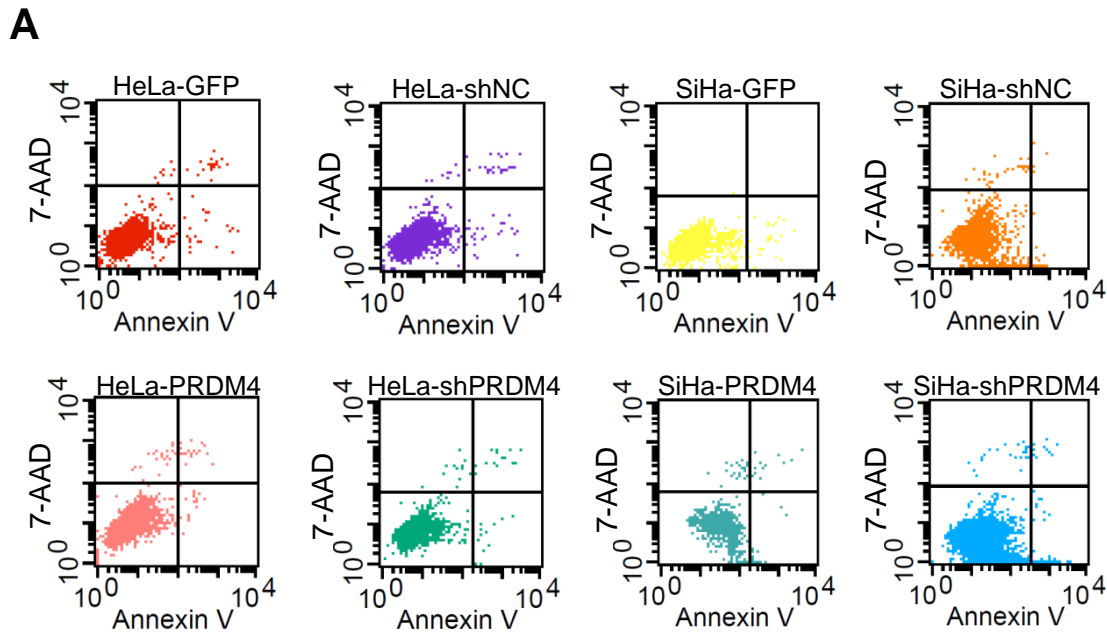

**Supplementary Figure 2. PRDM4 had no effect on apoptosis of cervical cancer cells.**

PRDM4 modified SiHa and HeLa cells were harvested on day 3 and stained with APC-Annexin V and 7-AAD Detection kit (BD, United States) according to the manufacturer's instructions. Apoptosis was detected with flow cytometer.

**A**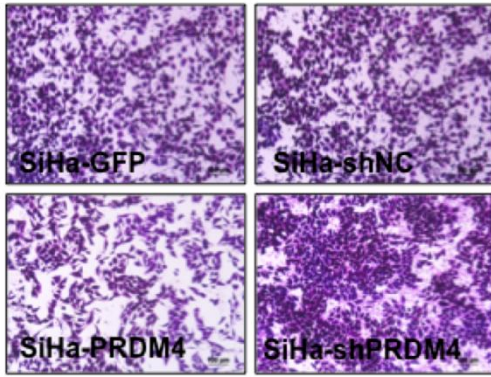**B**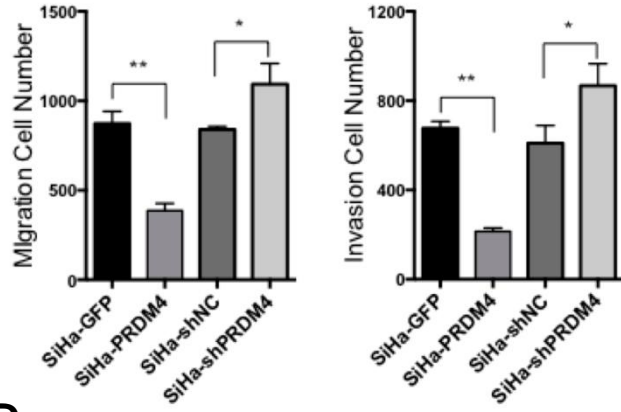**C**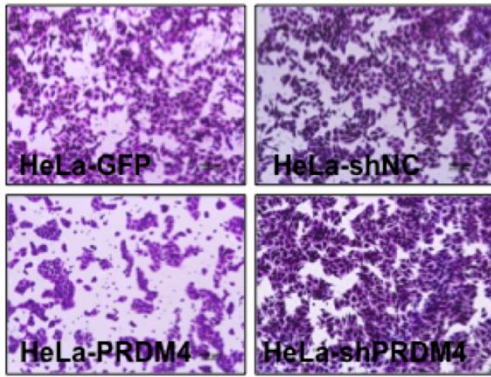**D**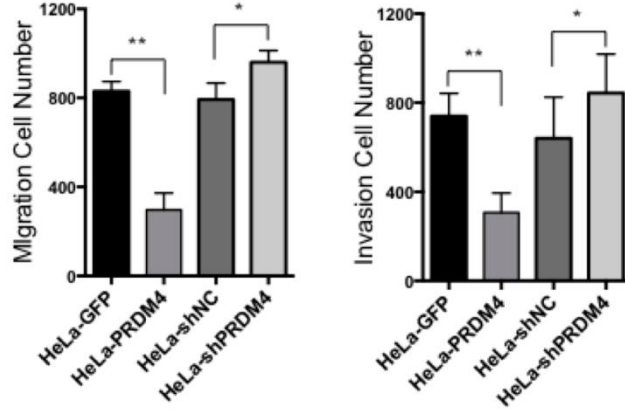

**Supplementary Figure 3. PRDM4 blocked migration and invasion ability of SiHa and HeLa cells *in vitro*.**

(A and B) The migratory potential of PRDM4-overexpressing or silencing SiHa cells and the respective controls was analyzed by the transwell cell migration and invasion assay. (C and D) The migratory potential of PRDM4-overexpressing or silencing HeLa cells and the respective controls was analyzed by the transwell assay. Scale bar, 100  $\mu$ m. Number of migratory or invasion cells was shown as mean  $\pm$  SD from three independent experiments using triplicate measurements and statistically analyzed with Student's *t*-test in each experiment. \*p < 0.05, \*\*p < 0.01

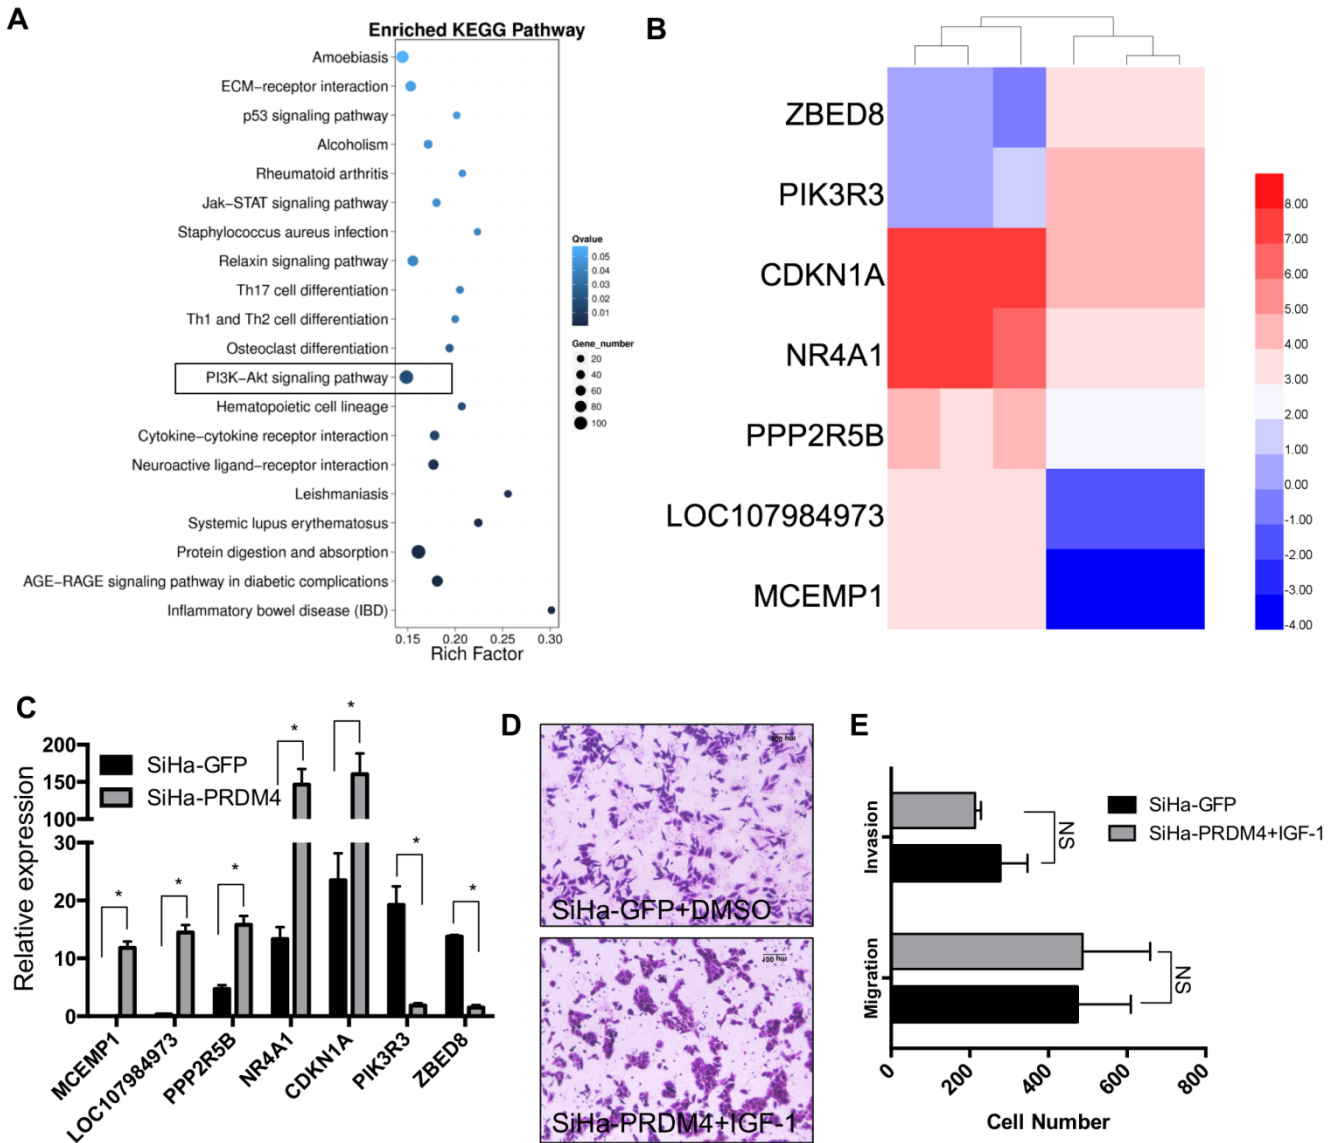

**Supplementary Figure 4. PRDM4 downregulated the migration and invasion related genes by inactivated PI3K/AKT pathway**

(A) Bioinformatics KEGG pathway analysis of RNA-seq was performed to confirm that the PI3K/AKT pathway was significantly enriched in cells with high expression of PRDM4. (B) Heatmap of all differentially expressed migration and invasion related genes regulated by PI3K/AKT pathway. (C) The mRNA levels of genes in SiHa-PRDM4 and SiHa-GFP cells detected by Real-time PCR analysis. (D) The migration and invasion potential was valued in SiHa-PRDM4 cells treated with the PI3K/AKT agonist. Scale bar, 50  $\mu$ m. Data represent mean  $\pm$  SD of three independent experiments and statistical analyzed with Student's *t*-test. \**p* < 0.05.

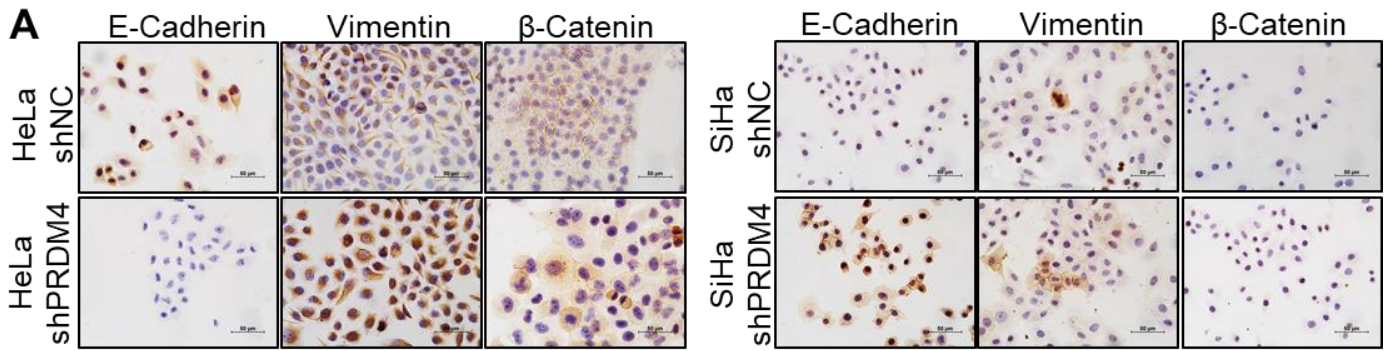

**Supplementary Figure 5. Silencing PRDM4 facilitates the epithelial–mesenchymal transition (EMT) related proteins.**

(A) The expression level of E-Cadherin,  $\beta$ -Catenin and Vimentin in PRDM4-silencing HeLa or SiHa cells and the respective control cells were detected by Immunocytochemistry. Scale bar, 50  $\mu$ m.

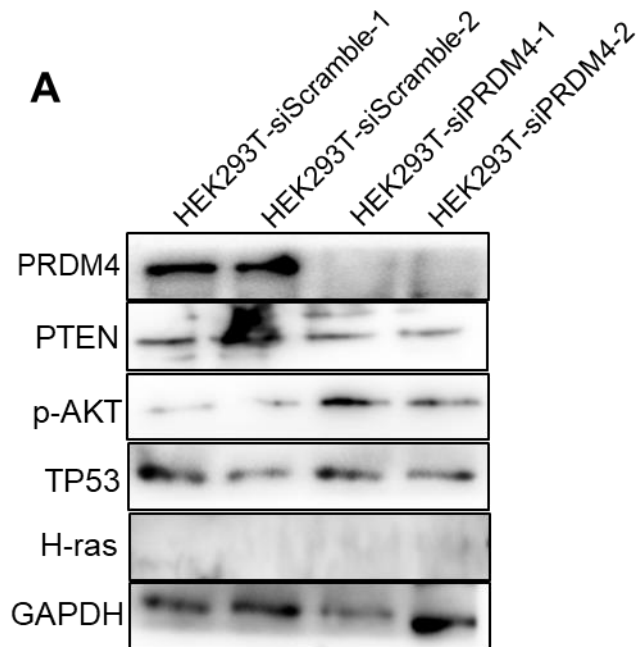

**Supplementary Figure 6. Silence of PRDM4 in non-tumor cells HEK293T cells**

(A) The expression of oncogene p53, H-Ras, PTEN and p-AKT were detected in PRDM4 silencing HEK293T cells by Western blot.

**Supplementary Table 1. PRDM4 expression in cervical cancer patients with different HPV status**

| HPV status     | n  | PRDM4 IRS   | p-value |
|----------------|----|-------------|---------|
| positive group | 19 | 3.86 ± 0.82 | 0.32    |
| negative group | 3  | 4.13 ± 1.31 |         |

Note: For comparison, the *t*-test was performed. A p value <0.05 was considered statistically significant.

**Supplementary Table 2. Antibody used in western blot**

| antibody                                     | dilution | Lot#                                                   |
|----------------------------------------------|----------|--------------------------------------------------------|
| anti-PRDM4                                   | 1:1000   | #ab126939, Abcam, Cambridge, USA                       |
| anti-GAPDH                                   | 1:1000   | #sc-47724, Santa Cruz, USA                             |
| anti-p27                                     | 1:1000   | #sc-53936, Santa Cruz, USA                             |
| anti-p21                                     | 1:500    | #sc-56335, Santa Cruz, USA                             |
| anti-AKT                                     | 1:500    | #sc-5298, Santa Cruz, USA                              |
| anti-p-AKT                                   | 1:1000   | #13038, p-AKT (Thr308), Cell Signaling Technology, USA |
| anti-CyclinD1                                | 1:500    | #sc-8396, Santa Cruz, USA                              |
| anti-CyclinE                                 | 1:500    | #sc-247, Santa Cruz, USA                               |
| anti-CDK4                                    | 1:500    | #sc-23896, Santa Cruz, USA                             |
| anti-H-ras                                   | 1:500    | #sc-35, Santa Cruz, USA                                |
| anti-TP53                                    | 1:500    | #sc-126, Santa Cruz, USA                               |
| HRP conjugated anti-rabbit or anti-mouse IgG | 1:10000  | #21234 and 32430 Thermo Fisher Scientific, NY, USA     |

**Supplementary Table 3. The primer sequences used for the cell cycle related gene by Real-time PCR**

| gene name | Sense                  | Antisense              |
|-----------|------------------------|------------------------|
| P53       | AAGAAACTGGCGGAATGGC    | CCAAGAACCACCCCTGAGTC   |
| P27       | CTGCCCTCCCCAGTCTCTCT   | CAAGCACCTCGGATTTT      |
| P21       | GCAGACCAGCATGACAGATTTC | CGGATTAGGGCTTCCTCTTG   |
| CDK4      | ATGTTGTCCGGCTGATGGA    | CACCAGGGTTACCTTGATCTCC |
| CyclinD1  | AAACAGATCATCCGCAAACAC  | GTTGGGGCTCCTCAGGTTC    |
| PTEN      | GCTTGTCAATCCCTTCTACG   | CAGCCAACCATCTTGTCTAACT |
| GAPDH     | GCACCGTCAAGGCTGAGAAC   | TGGTGAAGACGCCAGTGGA    |

## **Material and methods for the Supplementary data**

### **Apoptosis analysis by FACS**

Apoptosis was analyzed *in vitro* using the FACS Annexin V assay kit (BD Biosciences) according to the manufacturer's instructions. Briefly, cells were harvested at  $1 \times 10^5$  cells per tube, and stained in duplicate with 5  $\mu$ l of APC-Annexin V conjugate and 5  $\mu$ l of propidium iodide (10  $\mu$ g/ml) for 30 min in the dark. Subsequently, the samples were analyzed by a FACS Calibur flow cytometry (Becton Dickinson, Franklin Lakes, NJ, USA). The percent of apoptotic cells is referred to as the apoptotic index.

### **Migration and invasion assays**

Trans-well chambers (Corning, Corning, NY, USA) equipped with 8- $\mu$ m pore insets were used for the migration and invasion assays. For the migration assay,  $8 \times 10^4$  PRDM4-overexpressing SiHa or HeLa cells and the respective control cells in serum-free medium were plated on uncoated insets and incubated for 48 h. For the invasion assay, the insets were coated with 70  $\mu$ L of 1:8-diluted Matrigel (BD Biosciences), and  $1 \times 10^5$  cells were plated in the serum-free medium described above for an incubation period of 48 h. Quantities of 600  $\mu$ L of culture medium containing 20% FBS (Invitrogen) were added to the lower chamber. Non-invaded cells were removed, and the cells that were attached to the bottom of the membrane were fixed with 4% paraformaldehyde, stained with 5% crystal violet (Sigma-Aldrich), and counted at 200-fold magnification. The experiment was repeated in three independent experiments.
